# Supplementary material for: Src kinase phosphorylates Notch1 to inhibit MAML binding
Source: PubMed Central journal article supplement (PMC6195628; doi:10.1038/s41598-018-33920-y), 2018-10-19

## SUPPLEMENTARY INFORMATION

### Src kinase phosphorylates Notch1 to inhibit MAML binding

Bryce LaFoya<sup>1</sup>, Jordan A. Munroe<sup>2</sup>, Xinzhu Pu<sup>3</sup>, & Allan R. Albig<sup>1,2,#</sup>

<sup>1</sup> Biomolecular Sciences PhD Program. Boise State University. Boise, ID 83725, USA

<sup>2</sup> Department of Biological Sciences. Boise State University. Boise, ID 83725, USA

<sup>3</sup> Biomolecular Research Center. Boise State University. Boise, ID 83725, USA

Running Title: Src kinase regulates Notch

Keywords: Notch, microenvironment, phosphorylation, Src, SFK, integrin, MAGP2, MAML, phosphotyrosine

# Address correspondence to Allan Albig. [AllanAlbig@boisestate.edu](mailto:AllanAlbig@boisestate.edu)

# Supplementary Figure 1

Y2074: EGSYETAK, Y4-Phospho (79.96633 Da)

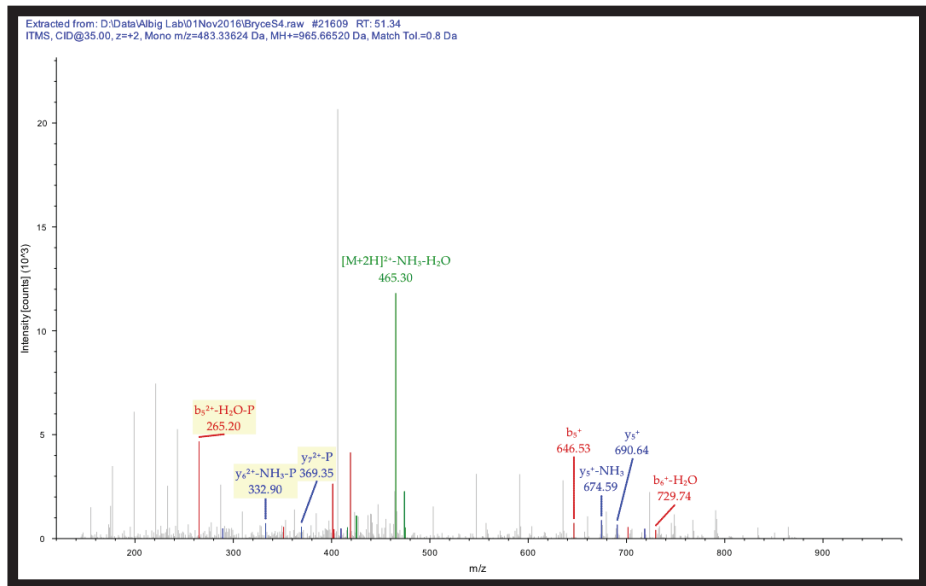

Y2116: MHHDIVRLLDEYNLVR, Y12-Phospho (79.96633 Da)

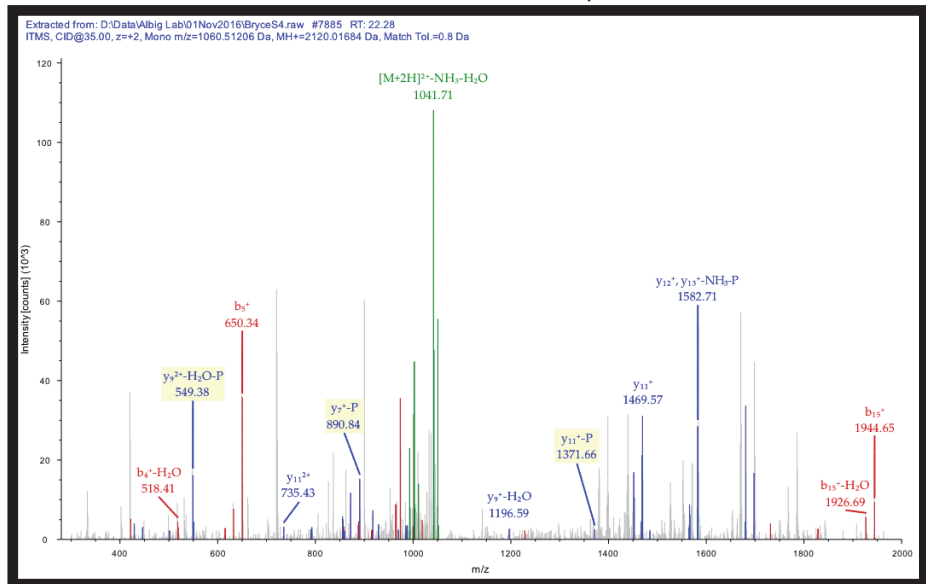

Y2145: SPQLHG TALGGTPTLSPTLCSPNGYLG NLK, Y25-Phospho (79.96633 Da)

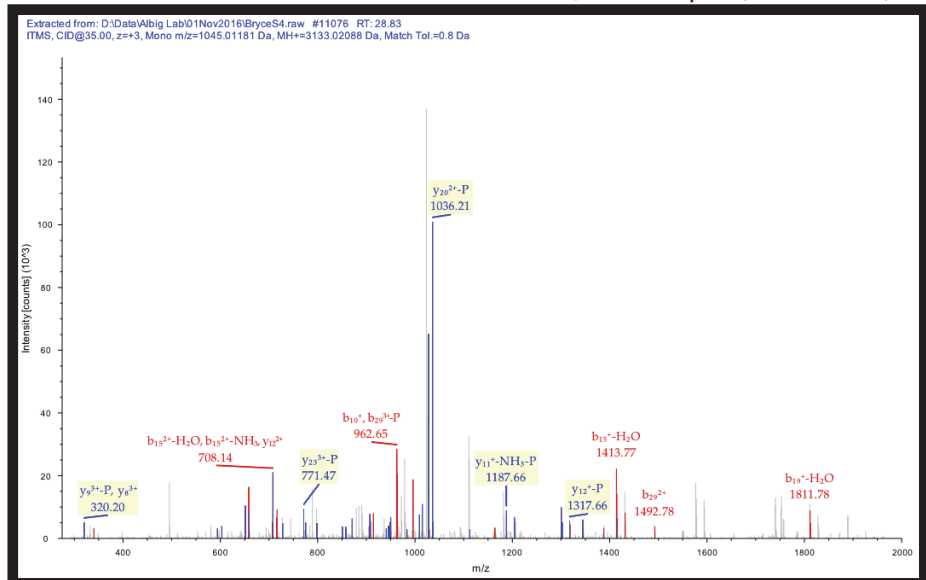

# Supplementary Figure 2

Y1938: Sequence: TGETALHLAARYSR, Y12-Phospho (79.96633 Da)

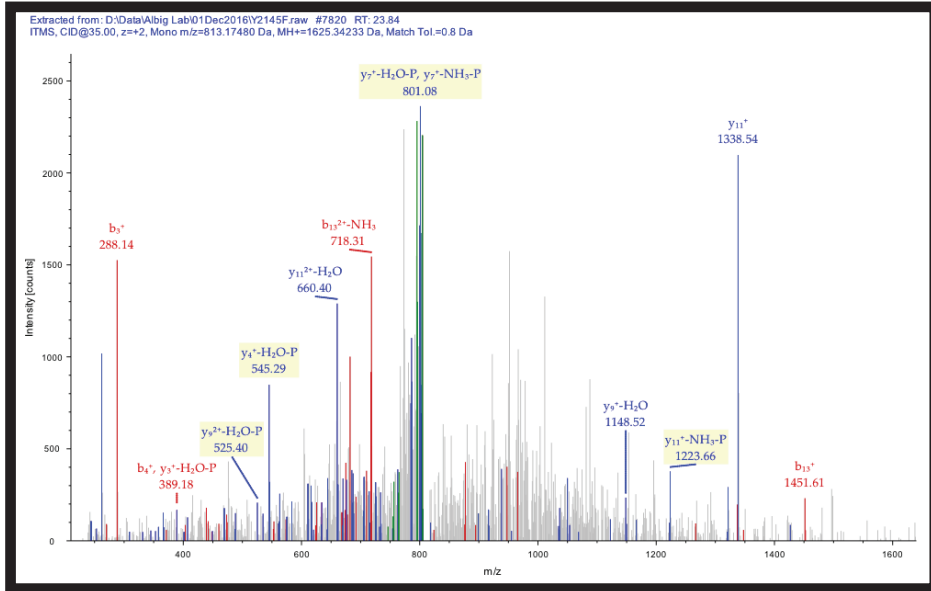

Y2074: DMQNNKEETPLFLAAREGSYETAK, Y20-Phospho (79.96633 Da)

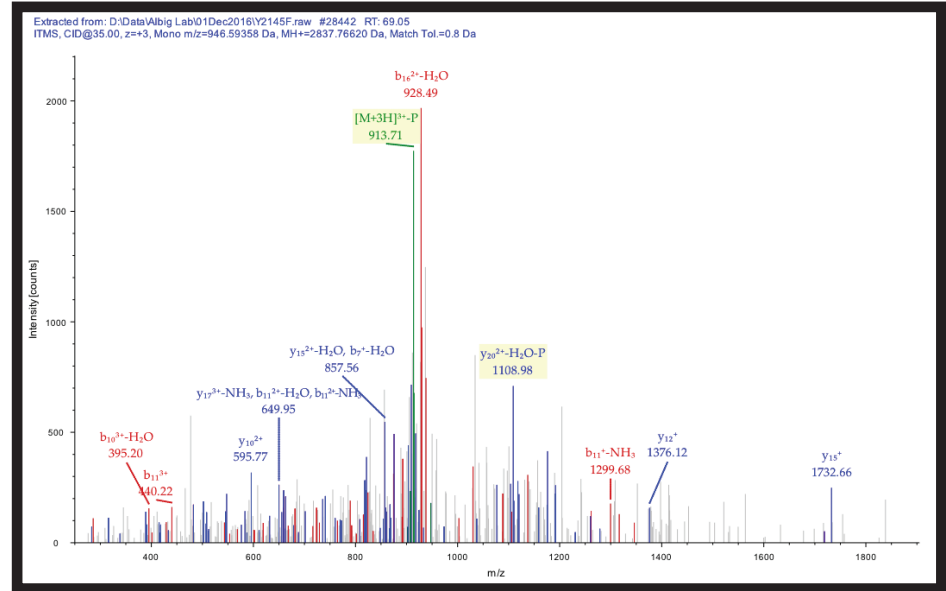

Y2116: LLDEYNLVRPQLHGTLGGTPSLPTLCSPLNGYLGNLK, Y5-Phospho (79.96633 Da)

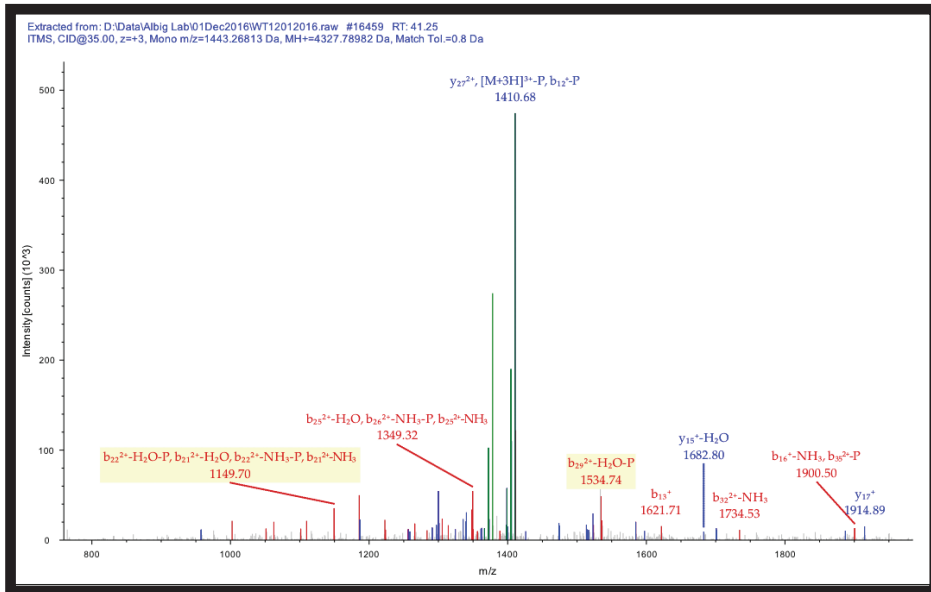

Y2145: SPQLHGTLGGTPSLPTLCSPLNGYLGNLK, Y25-Phospho, (79.96633 Da)

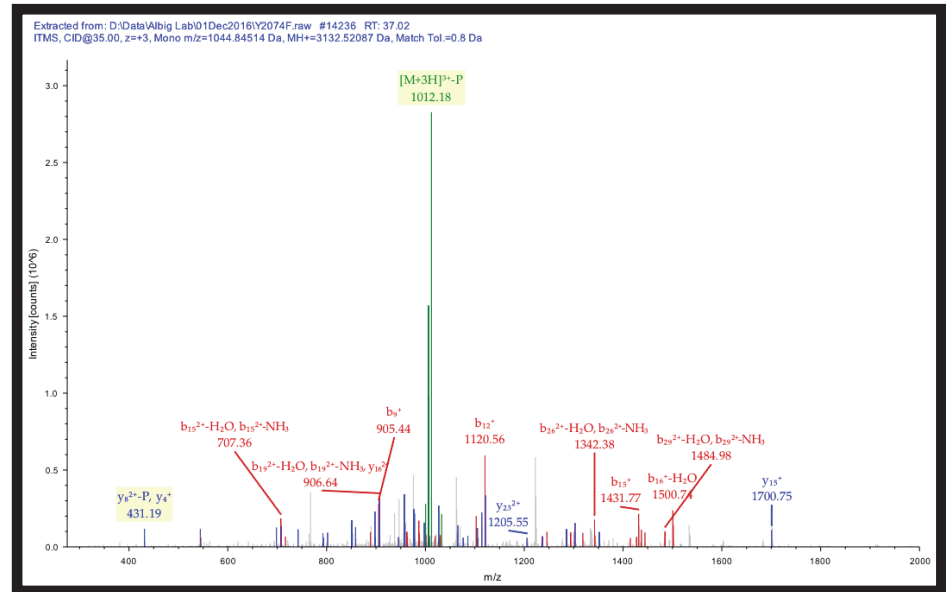

Fig. 1A

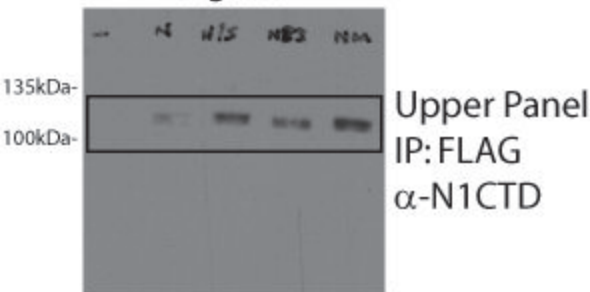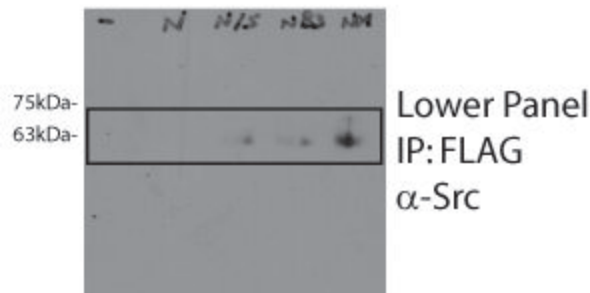

Fig. 1C

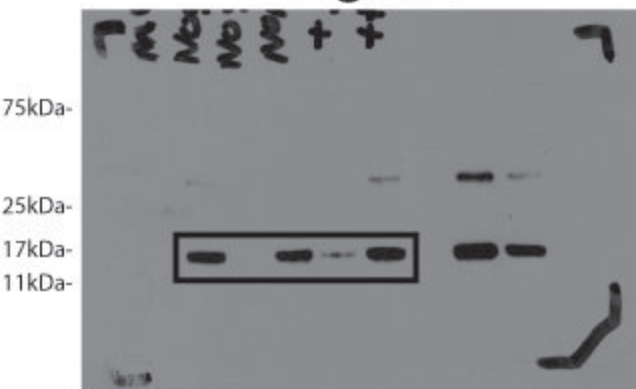

Upper Panel  
 $\alpha$ -FLAG

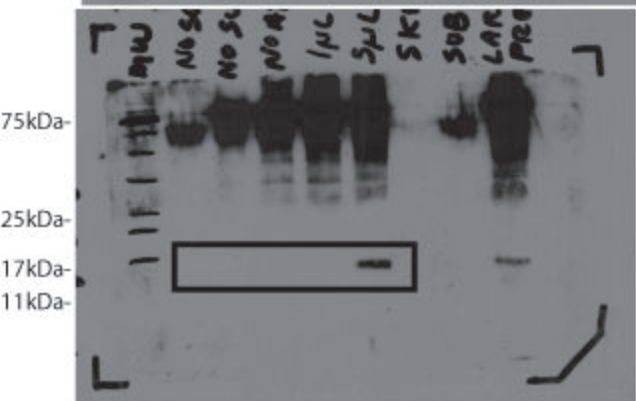

Lower Panel  
 $\alpha$ -pY

Fig. 1D

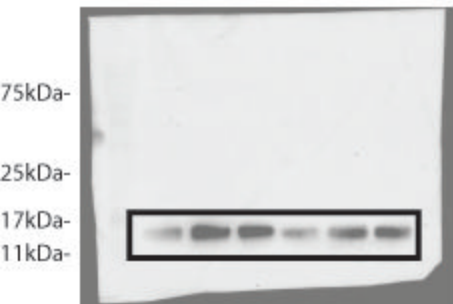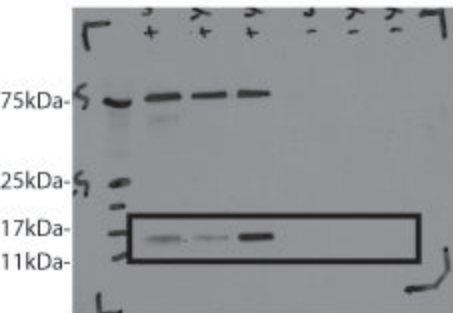

Fig. 2B

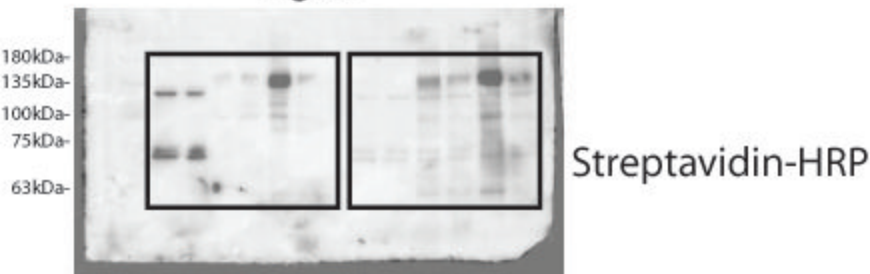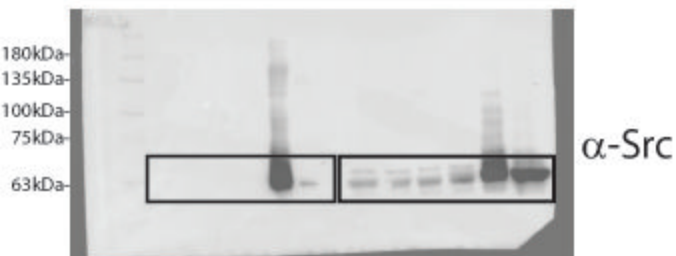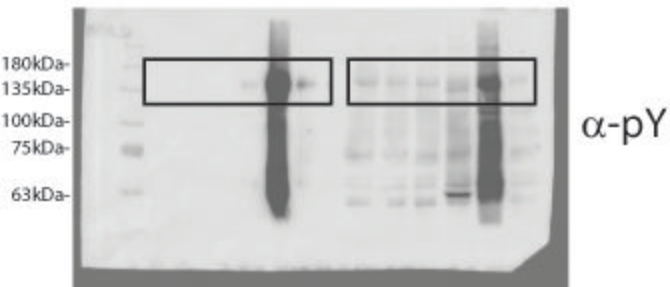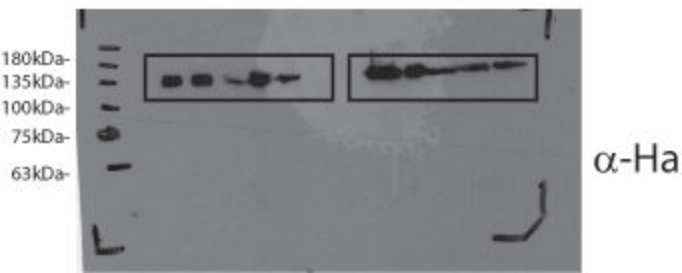

Fig. 2D

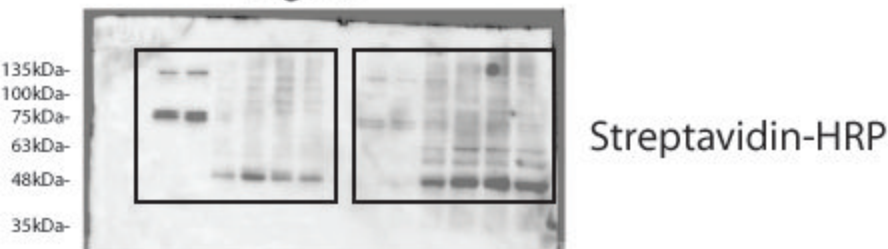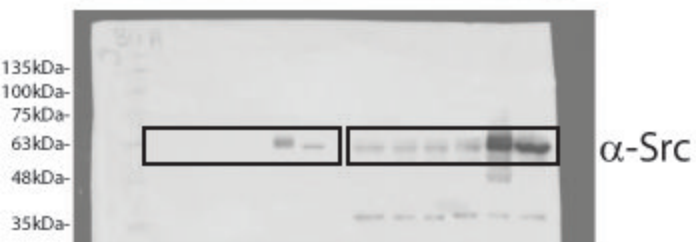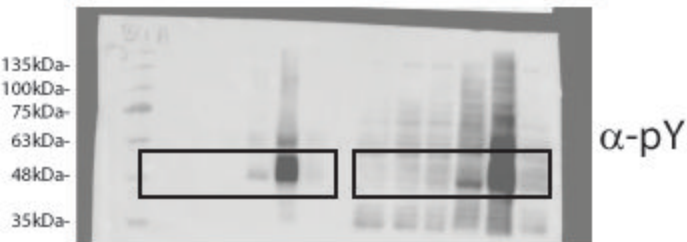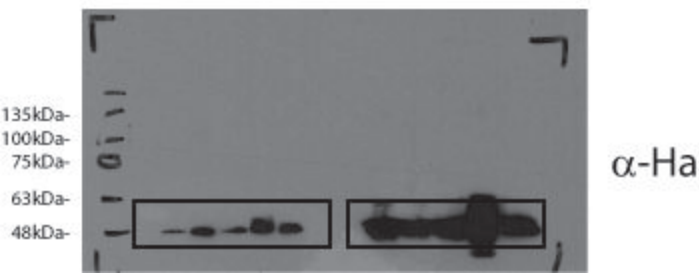



Fig. 2E

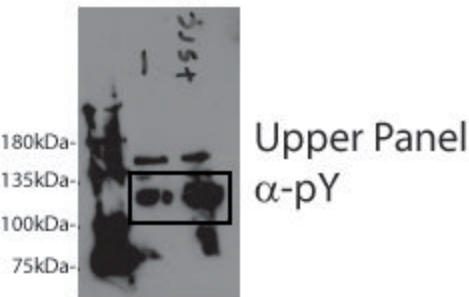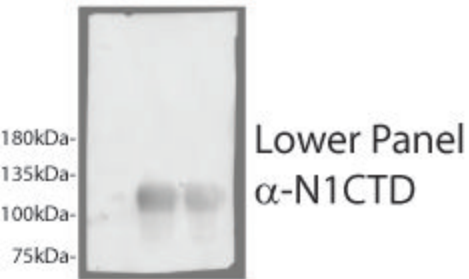

Fig. 2F

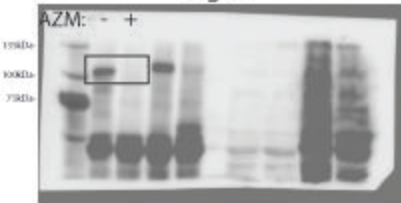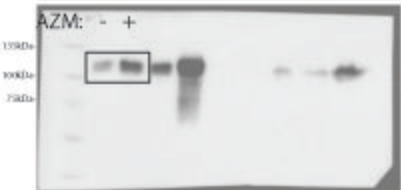

Fig. 2G

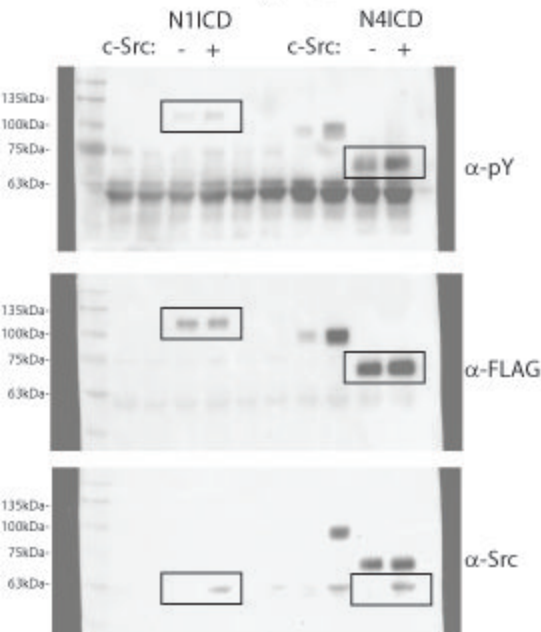

Fig. 4B

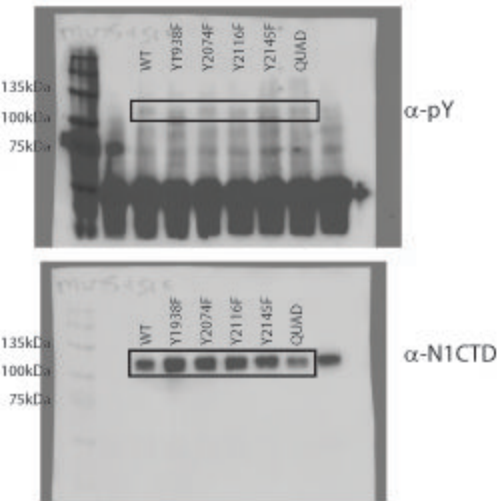

Fig. 5A

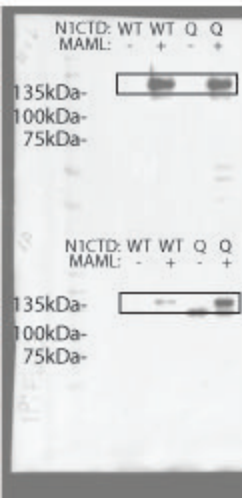

WCL  
 $\alpha$ -MAML

IP: FLAG  
 $\alpha$ -MAML

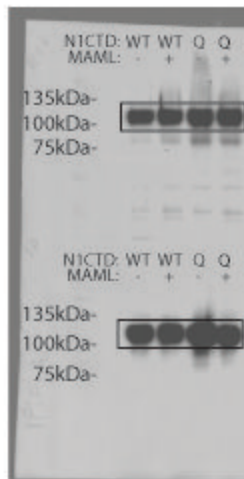

WCL  
 $\alpha$ -N1CTD

IP: FLAG  
 $\alpha$ -N1CTD

Fig. 5C

N1ICD-FLAG: + +  
MAML: + +  
AZM: + +

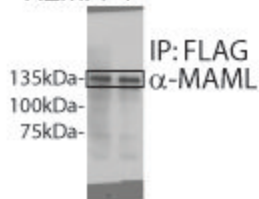

N1ICD-FLAG: + +  
MAML: + +  
AZM: + +

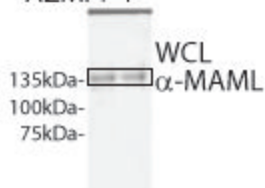

N1ICD-FLAG: + +  
MAML: + +  
AZM: + +

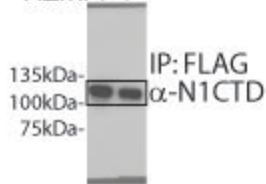

N1ICD-FLAG: + +  
MAML: + +  
AZM: + +

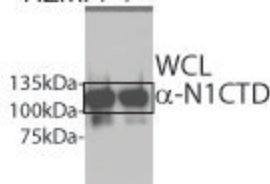

# Fig. 5E

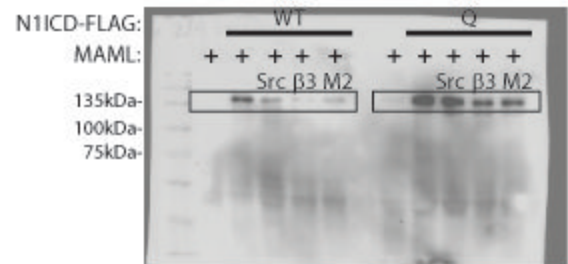

IP:FLAG  
 $\alpha$ -MAML

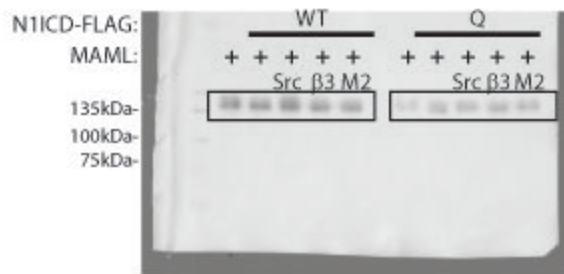

WCL  
 $\alpha$ -MAML

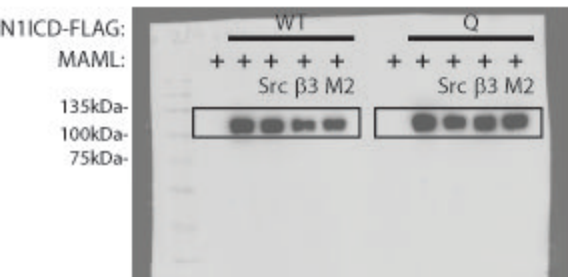

IP:FLAG  
 $\alpha$ -N1CTD

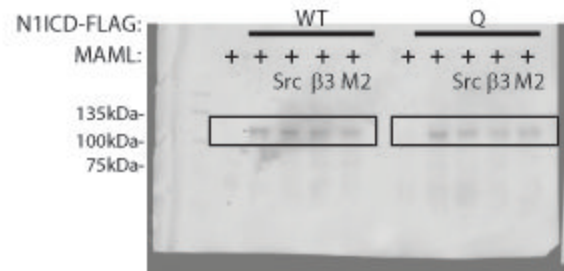

WCL  
 $\alpha$ -N1CTD

Fig. 6B

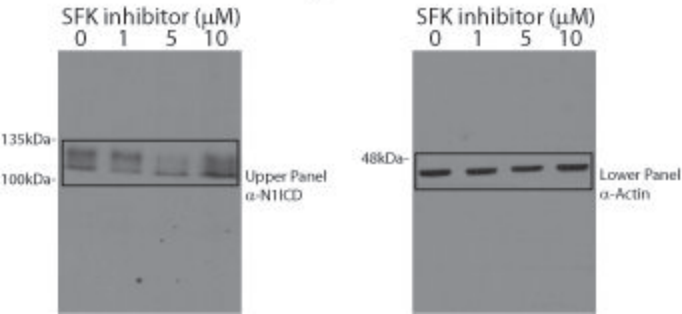



Fig. 6C

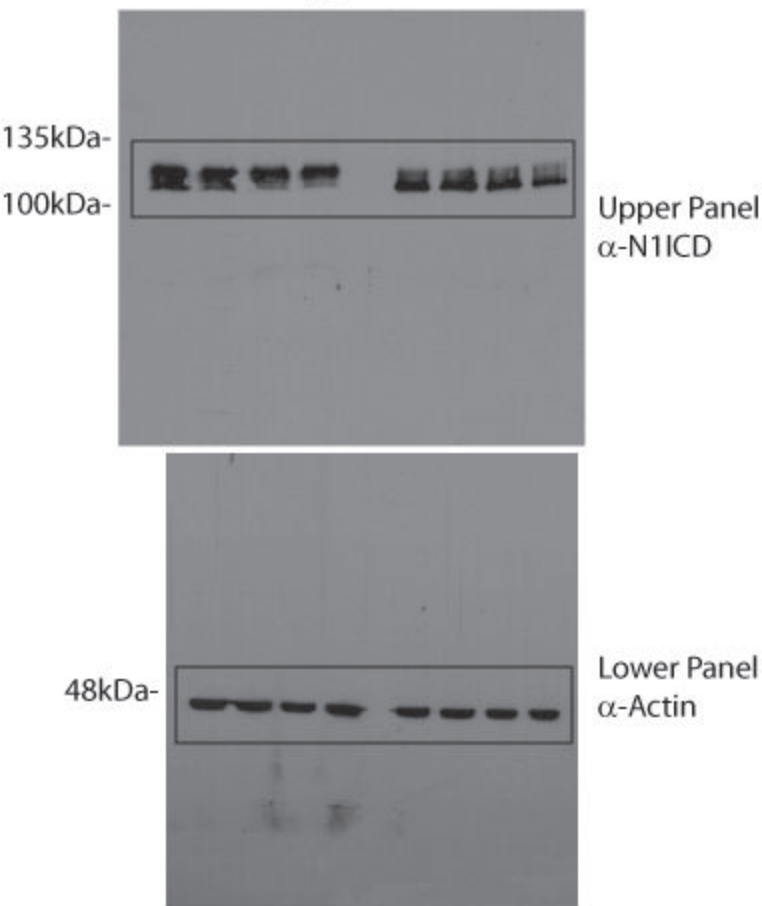

Fig. 6E

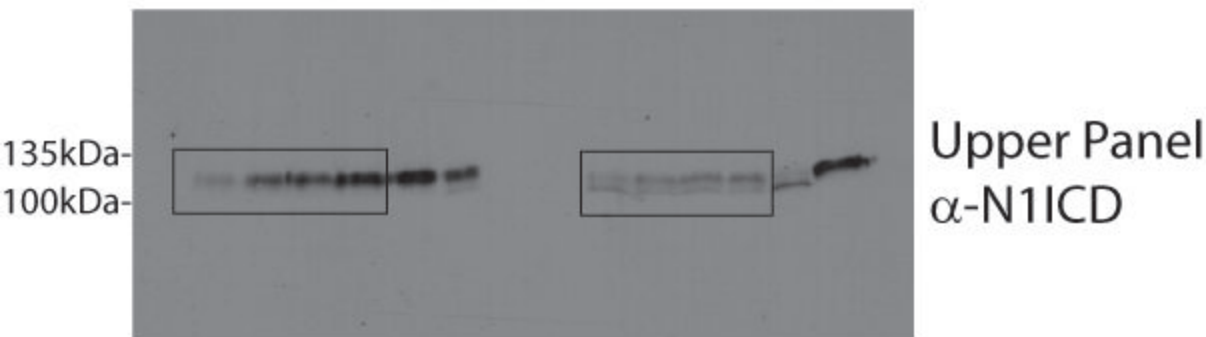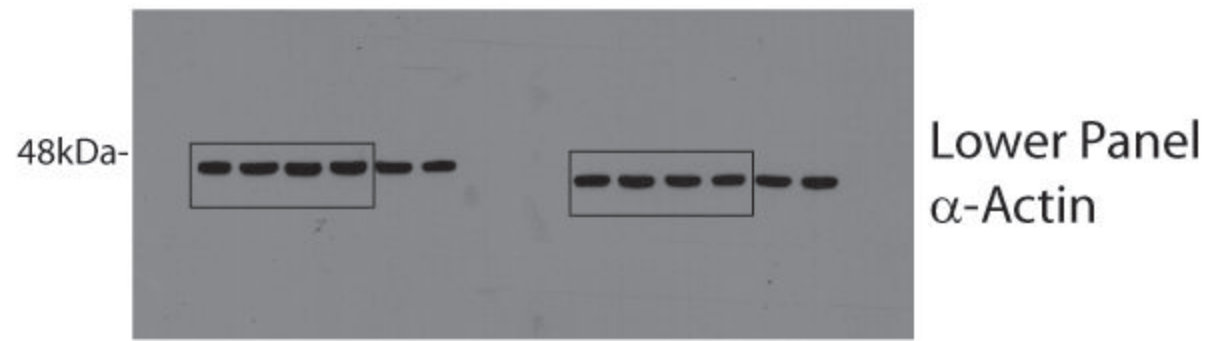

Supplement: 41598_2018_33920_MOESM1_ESM.pdf [file 41598_2018_33920_MOESM1_ESM.pdf]
